# Supplementary material for: Highly active and durable Pd nanocatalyst promoted by an oxygen-deficient terbium oxide (Tb4O7−x) support for hydrogenation and cross-coupling reactions
Source: Royal Society of Chemistry journal article supplement (doi:10.1039/c9nj01966a), 2019-01-01
Supplement: c9nj01966a1.pdf [file c9nj01966a1.pdf]

## Supporting Information

# Highly active and durable Pd nanocatalyst promoted by oxygen-deficient terbium oxide ( $\text{Tb}_4\text{O}_{7-x}$ ) support for hydrogenation and cross-coupling reactions

*Yi-Fan Jiang, Cheng-Zong Yuan, Tuck-Yun Cheang\*<sup>b</sup> and An-Wu Xu\*<sup>a</sup>*

*<sup>a</sup>Division of Nanomaterials and Chemistry, Hefei National Laboratory for Physical Sciences at Microscale, Department of Chemistry, University of Science and Technology of China, Hefei 230026, China*

*<sup>b</sup>Department of Vascular Surgery, Department of Neurological Intensive Care Unit, The First Affiliated Hospital of Sun Yat-Sen University, Guangzhou, 510080, P. R. China.*

*\*To whom correspondence should be addressed.*

*Email: anwuxu@ustc.edu.cn*

## Experimental Section

### Materials

Ammonia solution ( $\text{NH}_3 \cdot \text{H}_2\text{O}$ ), potassium carbonate ( $\text{K}_2\text{CO}_3$ ), sodium borohydride ( $\text{NaBH}_4$ ), absolute ethanol, 4-Nitrophenol (reagent grade), Styrene, ethylenediamine ( $\text{C}_2\text{H}_8\text{N}_2$ ), 1,3,5-trimethylbenzene, iodobenzene ( $\text{C}_6\text{H}_5\text{I}$ ) and bromobenzene ( $\text{C}_6\text{H}_5\text{Br}$ ) were obtained from Sinopharm Chemical Reagent. Terbium (III) nitrate pentahydrate ( $\text{Tb}(\text{NO}_3)_3 \cdot 3\text{H}_2\text{O}$ ) and phenylboronic acid ( $\text{C}_6\text{H}_7\text{BO}_2$ ) were bought from aladdin. Sodium tetrachloropalladate ( $\text{Na}_2\text{PdCl}_4$ ) was bought from Aldrich. All reagents were used directly without further purification. Water was purified using ion exchange (MilliQ, Millipore), and served as deionized water (DI water).

### Synthesis of $\text{Tb}_4\text{O}_7$ nanorods

The precursor of  $\text{Tb}_4\text{O}_7$  nanorods ( $\text{Tb}(\text{OH})_3$ ) were synthesized by solvothermal method. In a typical procedure, terbium (III) nitrate pentahydrate ( $\text{Tb}(\text{NO}_3)_3 \cdot 3\text{H}_2\text{O}$ ) was completely dissolved in 30 mL of deionized water (DI water) to form a clear aqueous solution. After adjusting the pH value of reaction system to 7 using 5% ammonia solution, 30 ml ethylenediamine ( $\text{C}_2\text{H}_8\text{N}_2$ ) was added into the solution and stirred for 1 h. Then, the mixture solution was transferred to a 100 ml Teflon-lined stainless steel autoclave, which was heated at 170 °C for 12 h and cooled down to room temperature naturally. The resulting precipitate was collected by centrifuge and washed several times with DI water and absolute ethanol in turn, and dried at 60 °C in a vacuum oven overnight. Finally, the dark brown  $\text{Tb}_4\text{O}_7$  nanorods was obtained by calcining the white precursor at 400 °C in air for 2 h with a heating rate of 2 °C  $\text{min}^{-1}$ .

### Preparation of Pd- $\text{Tb}_4\text{O}_{7-x}$ nanorods catalyst

The Pd- $\text{Tb}_4\text{O}_{7-x}$  hybrid nanocomposites were fabricated using the as-prepared  $\text{Tb}_4\text{O}_7$  nanorods as supports and  $\text{Na}_2\text{PdCl}_4$  as the palladium source by aqueous impregnation and hydrogen-reduction method. Typically, 100 mg  $\text{Tb}_4\text{O}_7$  nanorods was well dispersed in 30 mL DI water, and then  $\text{Na}_2\text{PdCl}_4$  solution (10 mM) was added dropwise to the above solution. After stirring overnight, the final product was collected by filtration and then washed four times with deionized water and absolute ethanol in turn, and dried under vacuum overnight. Finally, the dried powders were calcined at 250 °C in a 5%  $\text{H}_2/\text{Ar}$  reducing atmosphere for 2 h with a heating rate of 2

°C min<sup>-1</sup>. For comparison, the bare Tb<sub>4</sub>O<sub>7</sub> support was also calcined under 5% H<sub>2</sub>/Ar reducing atmosphere.

### **Characterization**

The crystal structural information was taken using powder X-ray diffraction (XRD) measurements, recorded on a Philips X'Pert Pro Super X-ray diffractometer with Cu K $\alpha$  radiation ( $\lambda = 1.54178 \text{ \AA}$ ). The morphology and microstructure was analyzed by transmission electron microscopy (TEM) and high-resolution TEM (HRTEM) images taken on JEOJ-2010 transmission electron microscope with an acceleration voltage of 200 kV. The corresponding element composition was detected by energy disperse spectroscopy (EDS) analysis on a JEM-2100 electron microscope at an accelerating voltage of 200 kV. The valence state information was obtained by X-ray photoelectron spectroscopy (XPS) measurements operated on the Photoemission Endstation in the National Synchrotron Radiation Laboratory (NSRL, Hefei, P. R. China). The inductively coupled plasma optical emission spectroscopy (ICP-OES) method was taken on a PerkinElmer Optima 8000 ICP-AES/ICP-OES spectrometer. The UV-vis absorption spectra measured with a Shimadzu UV-2510 spectrophotometer in the region of 250 to 550 nm were employed to find the reaction process. To detect the product rapidly and quantitatively, gas chromatograms (GC) were obtained on Agilent 7890B, Gas Chromatograph with a SGE BP1 non-polar 100% dimethylpolysiloxane capillary column of (30 m  $\times$  0.32 mm  $\times$  0.25  $\mu$ m) dimensions.

### **Catalytic reduction of 4-nitrophenol**

To investigate the catalytic activity of the Tb<sub>4</sub>O<sub>7-x</sub> supported Pd nanocatalyst, we selected the reduction of 4-nitrophenol (4-NP) to 4-aminophenol (4-AP) in NaBH<sub>4</sub> aqueous solution under room temperature as a model reaction. Typically, 4-nitrophenol (400  $\mu$ L, 10 mM) was added to NaBH<sub>4</sub> aqueous solution (8 mL, 0.1 M) under vigorous magnetic stirring to form a homogeneous bright yellow solution. Then, 50  $\mu$ L of Pd-Tb<sub>4</sub>O<sub>7-x</sub> aqueous suspension (1.4 mg mL<sup>-1</sup>) was added to the above solution rapidly, which was kept stirring until the color of the aqueous solution gradually changed from bright yellow to colorless. The reaction progress was monitored by measuring the absorbance of filtered solution as a function of time using UV-vis spectrometry.

### **Catalytic hydrogenation of styrene**

The catalytic properties of Pd-Tb<sub>4</sub>O<sub>7-x</sub> nanocomposites were also explored via hydrogenation of styrene using H<sub>2</sub> as the reductant under room temperature. Briefly, Pd-Tb<sub>4</sub>O<sub>7-x</sub> catalyst (5 mg) was ultrasonicated in 10 mL absolute ethanol to disperse it fully, after that, 5.0 mmol of styrene and 3.6 mmol of 1,3,5-trimethylbenzene (internal standard) were added to the above solution and stirred for 3 min. A balloon filled with hydrogen gas (1 atm) was then attached to the flask and the reaction system was stirred at room temperature for 1 h. The reaction was monitored by gas chromatography equipped with a flame ionization detector (FID) at specific times. To determine the catalytic recycling properties, the Pd-Tb<sub>4</sub>O<sub>7-x</sub> catalyst was separated after reaction for 1 h by centrifugation, and washed thoroughly with absolute ethanol. Finally, the catalyst was redispersed in a new reaction system for subsequent catalytic experiments under the same reaction conditions.

### **Suzuki coupling reactions**

In a typical reaction procedure, Pd-Tb<sub>4</sub>O<sub>7-x</sub> (5 mg) was homogeneously dispersed in 20 mL absolute ethanol, then 1 mmol of iodobenzene or bromobenzene, 2 mmol of phenylboronic acid, 276 mg of K<sub>2</sub>CO<sub>3</sub> (2 mmol) and 1.5 mmol of 1,3,5-trimethylbenzene (internal standard) were added to catalyst suspension. The mixture was stirred in a closed flask at 80 °C for a desired time. The reaction was monitored by gas chromatography (Agilent 7890B) at specific times. The recycling tests were carried out under the same conditions described above. The procedure for Suzuki coupling reaction was repeated for ten times.

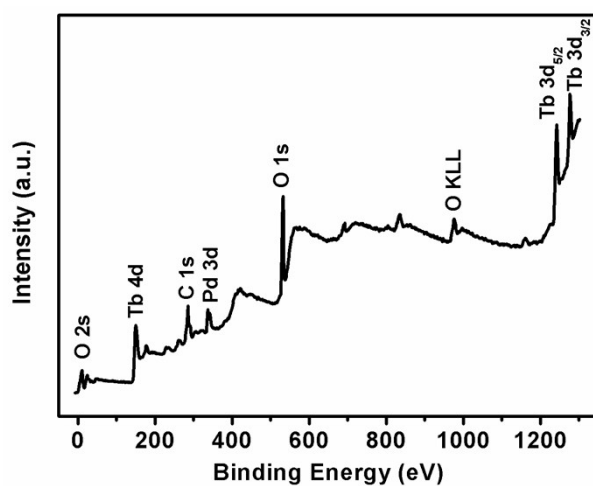

**Fig. S1** Survey XPS spectrum of Pd-Tb<sub>4</sub>O<sub>7-x</sub> sample.

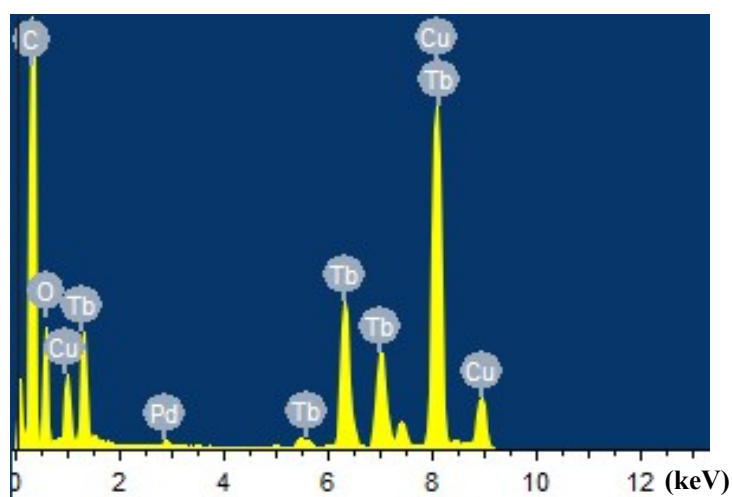

**Fig. S2** Energy dispersive spectroscopy (EDS) spectrum of Pd-Tb<sub>4</sub>O<sub>7-x</sub>.

**Table S1** Ratios of elements in the obtained Pd-Tb<sub>4</sub>O<sub>7-x</sub> nanocatalyst estimated from EDS analysis.

| Element        | C    | O     | Cu    | Pd   | Tb    |
|----------------|------|-------|-------|------|-------|
| Weight content | 8.19 | 4.9   | 41.09 | 1.02 | 44.80 |
| Atom content   | 35.4 | 15.89 | 33.57 | 0.5  | 14.64 |

**Table S2** Comparison of 4-NP reduction catalytic performances over Pd-based heterogeneous catalysts.

| Catalyst                            | Pd content | $k^a$ /s <sup>-1</sup> | $k^b$ /s <sup>-1</sup> g <sup>-1</sup> | Ref       |
|-------------------------------------|------------|------------------------|----------------------------------------|-----------|
| Pd-Tb <sub>4</sub> O <sub>7-x</sub> | 2.48 wt%   | $4.71 \times 10^{-2}$  | 673                                    | This work |
| Commercial Pd/C                     | 5 wt%      | $3.15 \times 10^{-2}$  | 450                                    | This work |
| Pd/ZnO (001)                        | 11.3 wt%   | $3.20 \times 10^{-3}$  | 320                                    | 1         |
| 61 wt%Ni-CeO <sub>2-x</sub> /Pd     | 0.1 wt%    | $4.79 \times 10^{-2}$  | 350                                    | 2         |
| Pd/Gd(OH) <sub>3</sub>              | 0.96 wt%   | $4.70 \times 10^{-2}$  | 235                                    | 3         |
| Pd/g-C <sub>3</sub> N <sub>4</sub>  | 1.5 wt%    | $7.29 \times 10^{-3}$  | 283                                    | 4         |
| Ni@Pd/KCC-1                         | 10 wt%     | $2.04 \times 10^{-2}$  | 51                                     | 5         |
| Pd/PPy/TiO <sub>2</sub>             | 21 wt%     | $1.22 \times 10^{-2}$  | 410                                    | 6         |
| Pd/TiO                              | 0.89 wt%   | $5.00 \times 10^{-2}$  | 500                                    | 7         |
| Pd/ZrO <sub>2</sub>                 | 1 mol%     | $7.67 \times 10^{-3}$  | /                                      | 8         |
| Pd/Al <sub>2</sub> O <sub>3</sub>   | 1 mol%     | $1.12 \times 10^{-2}$  | /                                      | 8         |

$k^a$ : the kinetic rate constant was calculated from the relationships between  $\ln C_t/C_0$  and reaction time in the reduction reaction of 4-NP.

$k^b$ : the catalytic activity factor was calculated by using  $k^b = k/m_{\text{catalyst}}$

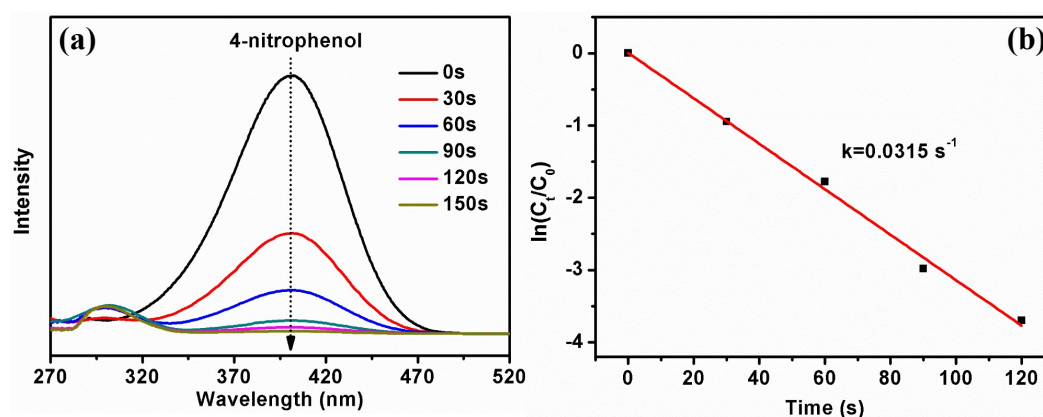

**Fig. S3** (a) Successive UV-vis spectra and corresponding (b) Kinetic curves for the reduction reaction of 4-NP with commercial 5% Pd/C nanocatalysts.  $C_t$  and  $C_0$  are 4-NP concentrations at time  $t$  and 0, respectively.

**Table S3** Comparison of styrene hydrogenation catalytic activity over Pd-based heterogeneous catalysts.

| Substrate | Product      | Catalyst                                  | TOF ( $\text{h}^{-1}$ ) <sup>b</sup> | Ref.      |
|-----------|--------------|-------------------------------------------|--------------------------------------|-----------|
| styrene   | ethylbenzene | Pd-Tb <sub>4</sub> O <sub>7-x</sub>       | 6437 <sup>a</sup>                    | This work |
| styrene   | ethylbenzene | Commercial 5 wt% Pd/C                     | 5419                                 | This work |
| styrene   | ethylbenzene | Pd/Gd(OH) <sub>3</sub>                    | 6159                                 | 3         |
| styrene   | ethylbenzene | Pd/TiO                                    | 4838                                 | 7         |
| styrene   | ethylbenzene | commercial 26 wt% Pd/C                    | 972                                  | 9         |
| styrene   | ethylbenzene | Pd single atoms/TiO <sub>2</sub>          | 8973                                 | 9         |
| styrene   | ethylbenzene | Fe <sub>3</sub> O <sub>4</sub> -NC-PZS-Pd | 1792                                 | 10        |
| styrene   | ethylbenzene | Pd-MnO <sub>x</sub> -CeO <sub>2</sub> -C  | 3325                                 | 11        |
| styrene   | ethylbenzene | Pd/PEG                                    | 660                                  | 12        |
| styrene   | ethylbenzene | Pd/MOF-5                                  | 682                                  | 13        |
| styrene   | ethylbenzene | (PdCl <sub>2</sub> /bpy) <sub>10</sub>    | 6944                                 | 14        |

<sup>a</sup> Reaction condition: styrene (5.0 mmol), 1,3,5-trimethylbenzene (internal standard, 3.6 mmol), catalyst (5.5 mg), ethanol (10 mL), 25 °C, 1 atm H<sub>2</sub>, the nominal weight content of Pd : 2.48 wt%.

<sup>b</sup> TOF: moles of styrene converted per mole of Pd per hour.

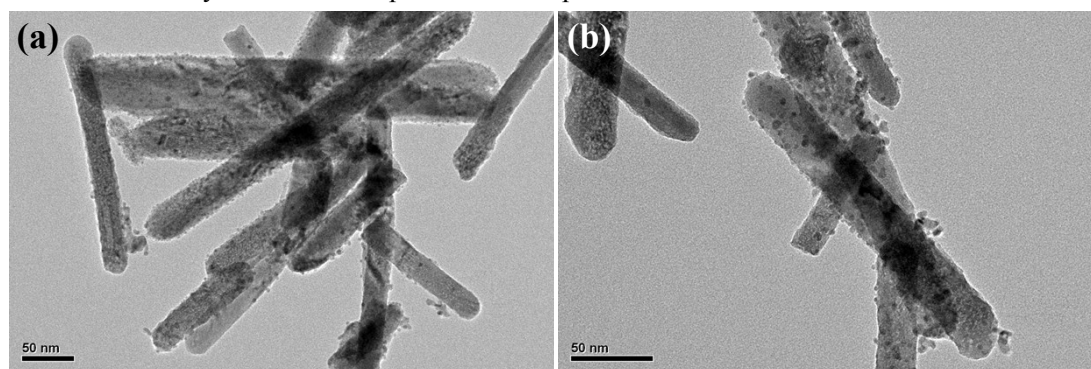

**Fig. S4** TEM images of the Pd-Tb<sub>4</sub>O<sub>7-x</sub> nanocatalysts after cycling test: (a) after 10 successive catalytic cycles towards Suzuki cross-coupling reaction, (b) after 23 catalytic cycles towards styrene hydrogenation.

## REFERENCES

1. Cui, F.; Zhang, J.; Shao, Q.; Xu, L.; Pan, X.; Wang, X.; Zhang, X.; Cui, T. Directed self-assembly of dual metal ions with ligands: towards the synthesis of noble metal/metal oxide composites with controlled facets. *Chem. Commun.* **2018**, *54*, 2044-2047.
2. Jiang, Y. F.; Yuan, C. Z.; Xie, X.; Zhou, X.; Jiang, N.; Wang, X.; Imran, M.; Xu, A. W. A novel magnetically recoverable Ni-CeO<sub>2-x</sub>/Pd nanocatalyst with superior catalytic performance for hydrogenation of styrene and 4-nitrophenol. *ACS Appl. Mater. Interfaces* **2017**, *9*, 9756-9762.
3. Ullah, N.; Imran, M.; Liang, K.; Yuan, C. Z.; Zeb, A.; Jiang, N.; Qazi, U. Y.; Sahar, S.; Xu, A. W. Highly dispersed ultra-small Pd nanoparticles on gadolinium hydroxide nanorods for efficient hydrogenation reactions. *Nanoscale* **2017**, *9*, 13800-13807.
4. Zhao, Y.; Tang, R.; Huang, R. Palladium supported on graphitic carbon nitride: an efficient and recyclable heterogeneous catalyst for reduction of nitroarenes and suzuki coupling reaction. *Catal. Lett.* **2015**, *145*, 1961-1971.
5. Dong, Z.; Le, X.; Dong, C.; Zhang, W.; Li, X.; Ma, J. Ni@Pd core-shell nanoparticles modified fibrous silica nanospheres as highly efficient and recoverable catalyst for reduction of 4-nitrophenol and hydrodechlorination of 4-chlorophenol. *Appl. Catal., B* **2015**, *162*, 372-380.
6. Liu, X.; Bian, X.; Nie, G.; Zhang, C.; Wang, C.; Wei, Y. Encapsulating conducting polypyrrole into electrospun TiO<sub>2</sub> nanofibers: a new kind of nanoreactor for in situ loading Pd nanocatalysts towards p-nitrophenol hydrogenation. *J. Mater. Chem.* **2012**, *22*, 12723-12730.
7. Imran, M.; Yousaf, A. B.; Zhou, X.; Jiang, Y. F.; Yuan, C. Z.; Zeb, A.; Jiang, N.; Xu, A. W. Pd/TiO nanocatalyst with strong metal-support interaction for highly efficient durable heterogeneous hydrogenation. *J. Phys. Chem. C* **2017**, *121*, 1162-1170.
8. Jin, Z.; Xiao, M.; Bao, Z.; Wang, P.; Wang, J. A general approach to mesoporous



metal oxide microspheres loaded with noble metal nanoparticles. *Angew. Chem., Int. Ed.* **2012**, *51*, 6406-6410.

9. Liu, P. X.; Zhao, Y.; Qin, R. X.; Mo, S. G.; Chen, G. X.; Gu, L.; Chevrier, D. M.; Zhang, P.; Guo, Q.; Zang, D. D.; Wu, B. H.; Fu, G.; Zheng, N. F. Photochemical route for synthesizing atomically dispersed palladium catalysts. *Science* **2016**, *352*, 797-800.

10. Yang, S. L.; Cao, C. Y.; Sun, Y. B.; Huang, P. P.; Wei, F. F.; Song, W. G. Nanoscale magnetic stirring bars for heterogeneous catalysis in microscopic systems. *Angew. Chem., Int. Ed.* **2015**, *54*, 2661-2664.

11. Yousaf, A. B.; Imran, M.; Zaidi, S. J.; Kasak, P.; Ansari, T. M.; Manzoor, S.; Yasmeen, G. Synergistic effect of interfacial phenomenon on enhancing catalytic performance of Pd loaded  $\text{MnO}_x\text{-CeO}_2\text{-C}$  hetero-nanostructure for hydrogenation and electrochemical reactions. *J. Mater. Chem. A* **2017**, *5*, 10704-10712.

12. Harraz, F. A.; El-Hout, S. E.; Killa, H. M.; Ibrahim, I. A. Palladium nanoparticles stabilized by polyethylene glycol: efficient, recyclable catalyst for hydrogenation of styrene and nitrobenzene. *J. Catal.* **2012**, *286*, 184-192.

13. Pan, Y. Y.; Ma, D. Y.; Liu, H. M.; Wu, H.; He, D. H.; Li, Y. W. Uncoordinated carbonyl groups of MOFs as anchoring sites for the preparation of highly active Pd nano-catalysts. *J. Mater. Chem.* **2012**, *22*, 10834-10839.

14. Gao, S. Y.; Li, W. J.; Cao, R. Palladium-pyridyl catalytic films: a highly active and recyclable catalyst for hydrogenation of styrene under mild conditions. *J. Colloid. Interf. Sci.* **2015**, *441*, 85-89.
